# Supplementary material
Source: Springer Nature journal article supplement (https://www.springermedizin.de/resource/supplementary/12876_2012_796_MOESM1_ESM.pdf/9437516)
Supplement: MOESM1 [file 9437516]

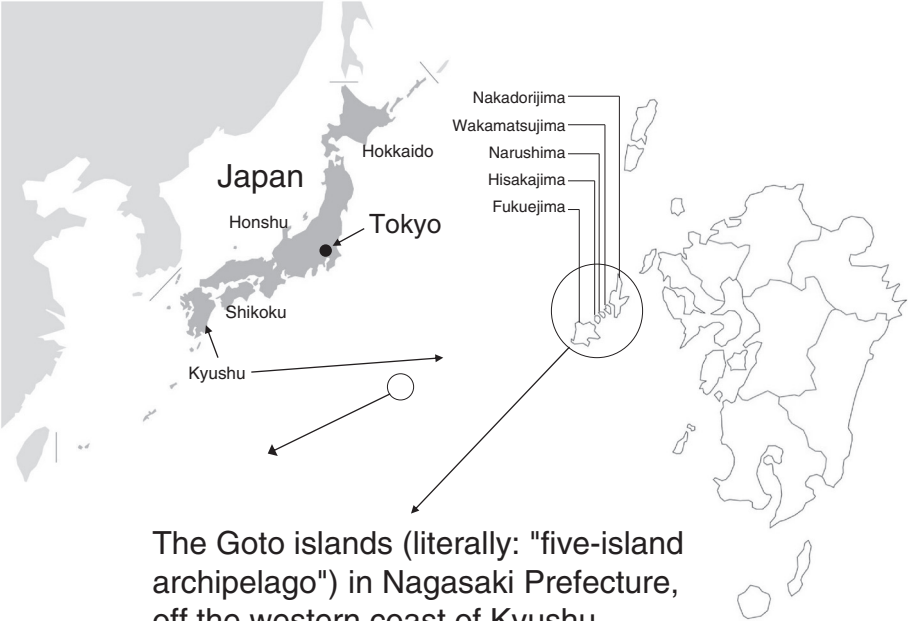

The Goto islands (literally: "five-island archipelago") in Nagasaki Prefecture, off the western coast of Kyushu
